# Supplementary material
Source: PubMed Central journal article supplement (PMC2830834)

# Supplementary Figure 1

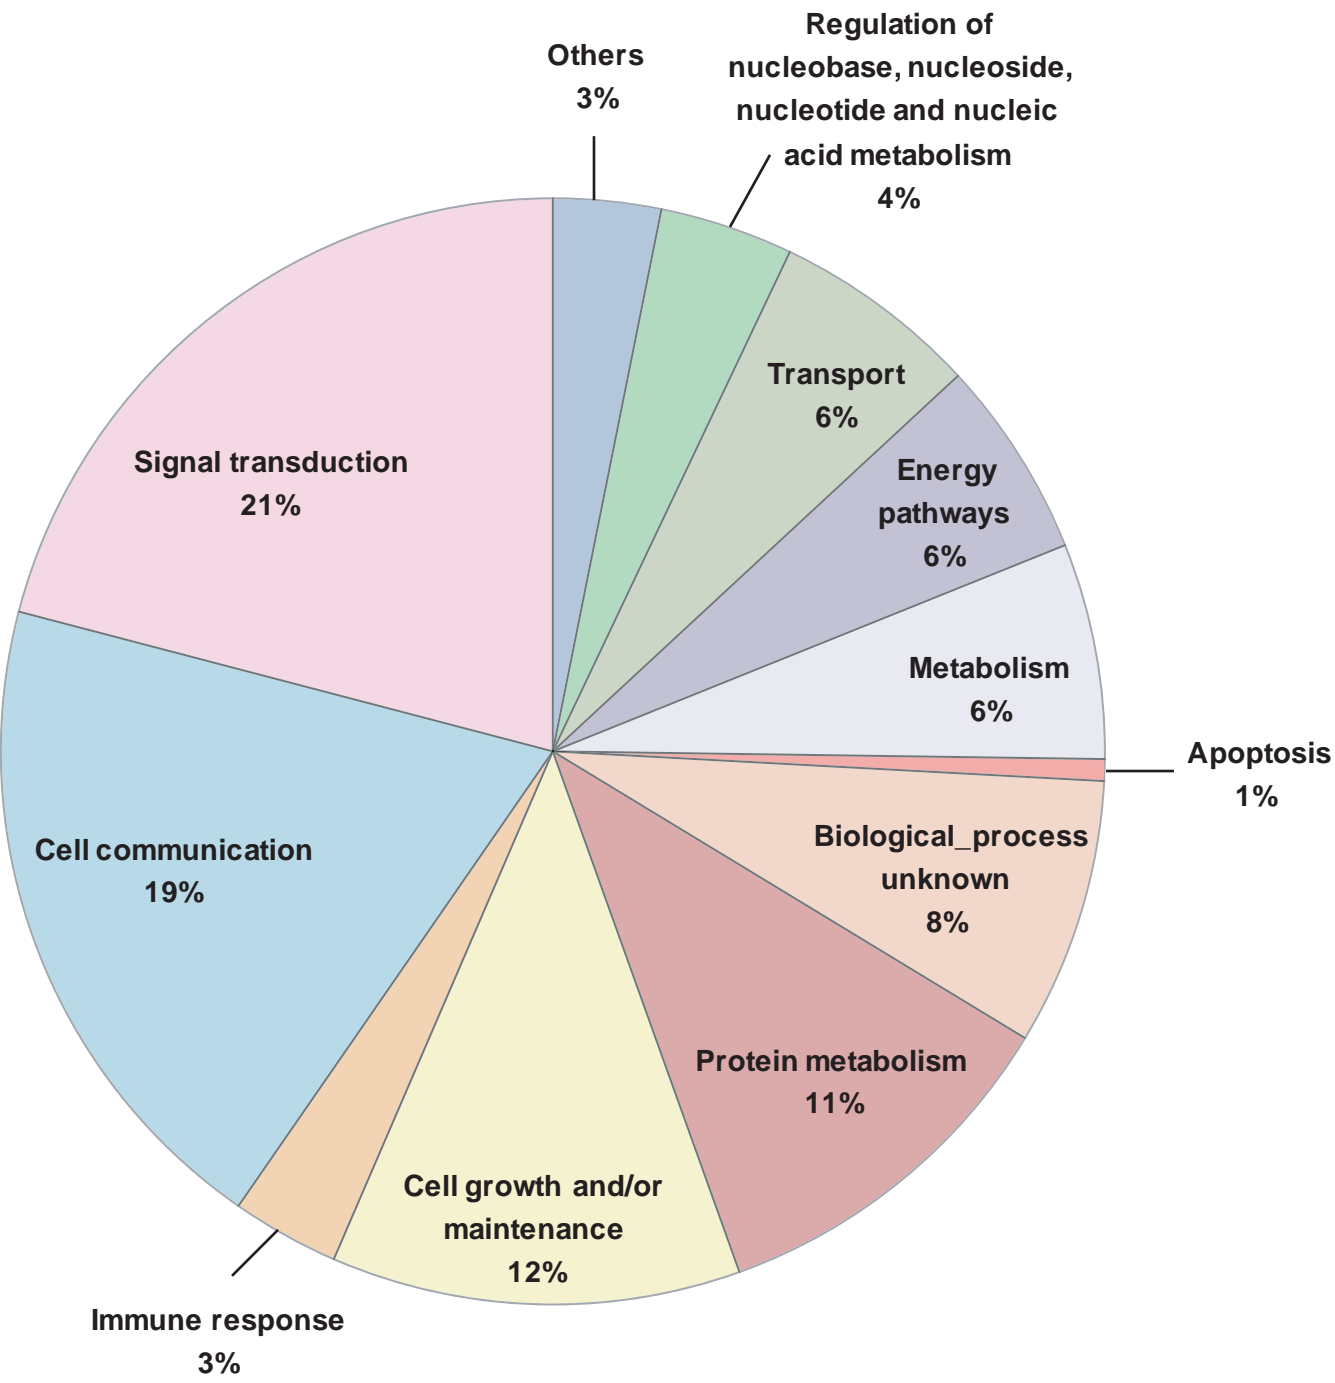

Supplement: supp_M900152-MCP200_Supp_Figure1.pdf [file supp_M900152-MCP200_Supp_Figure1.pdf]

# Supplementary Figure 2

**A**

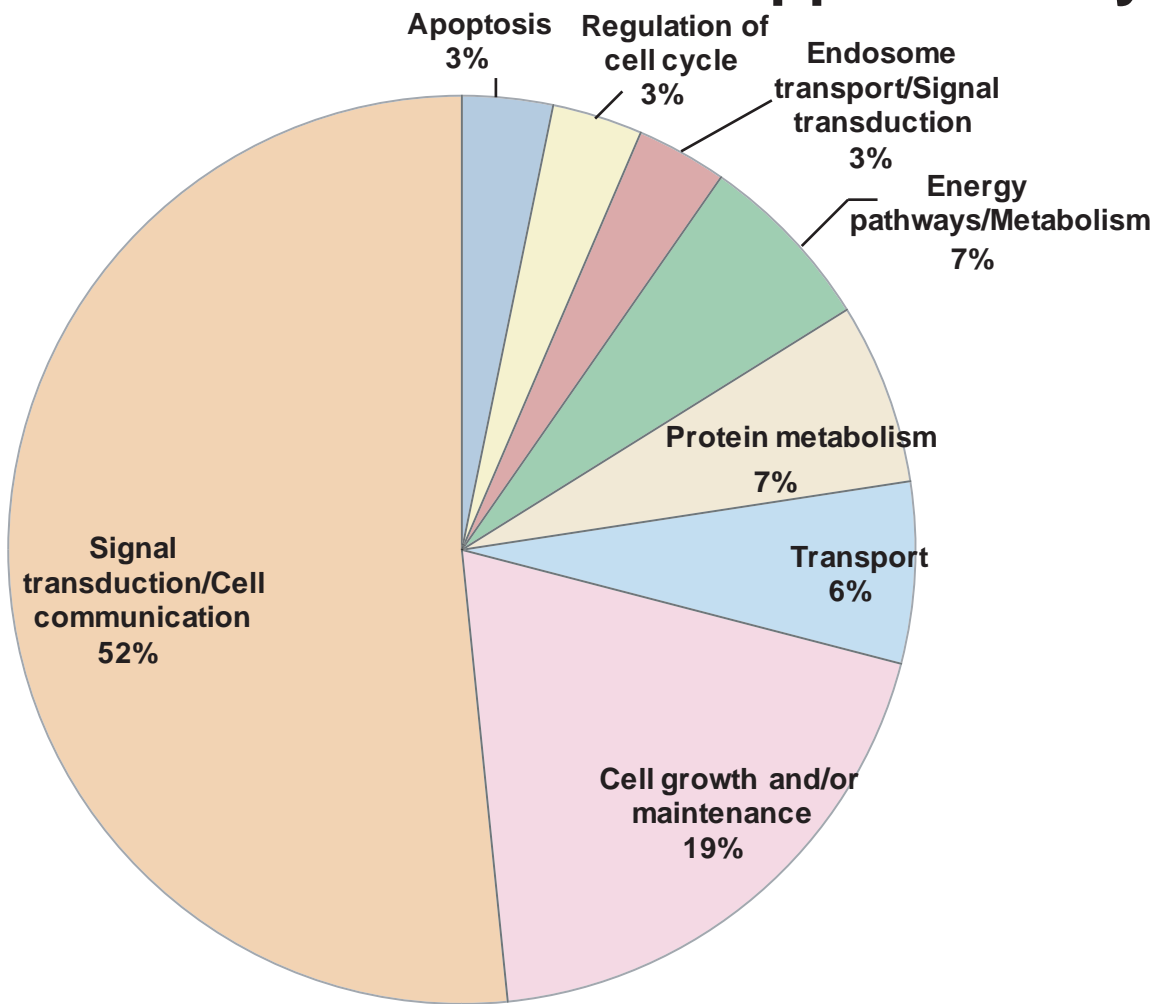

**B**

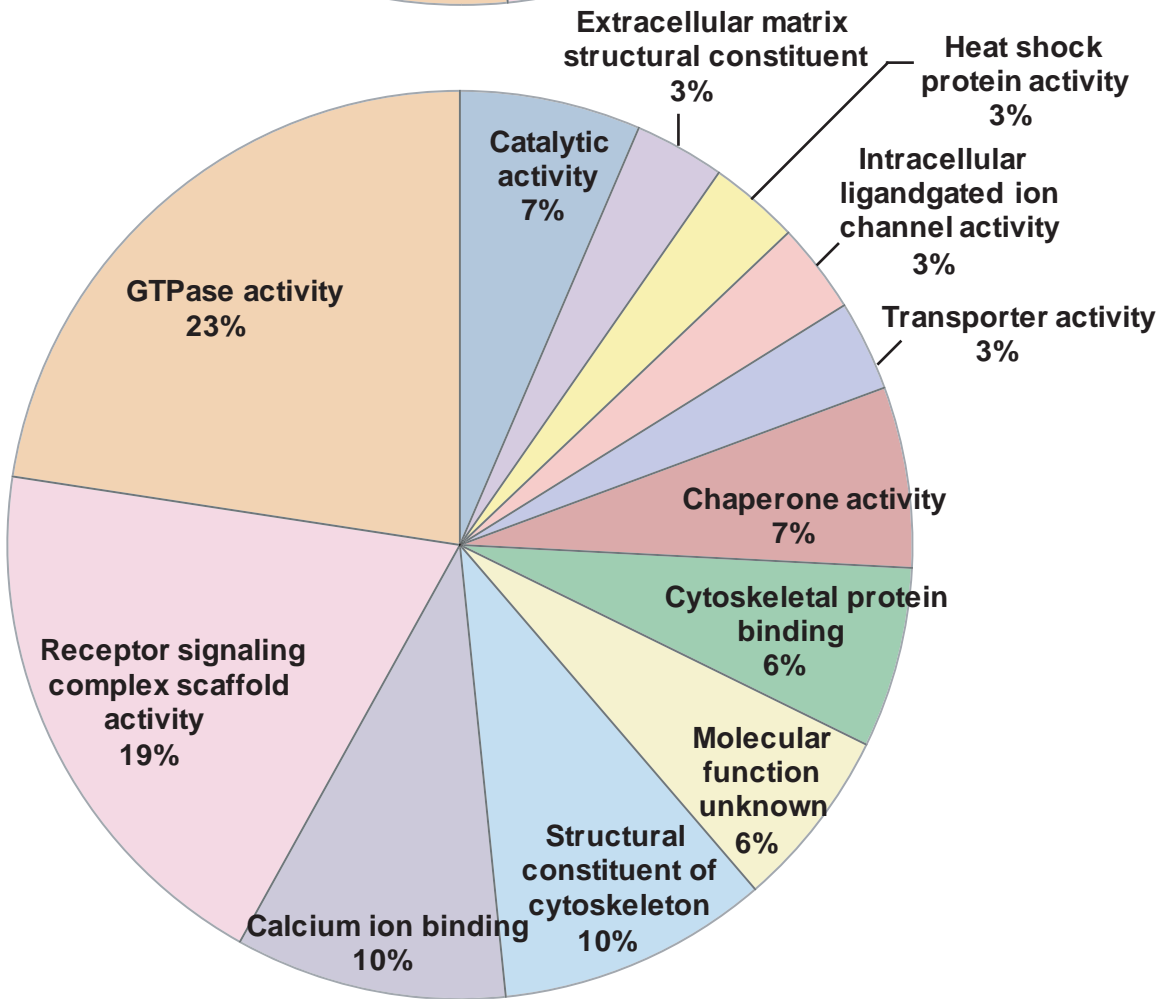

Supplement: supp_M900152-MCP200_Supp_Figure2.pdf [file supp_M900152-MCP200_Supp_Figure2.pdf]

# Supplementary Figure 3

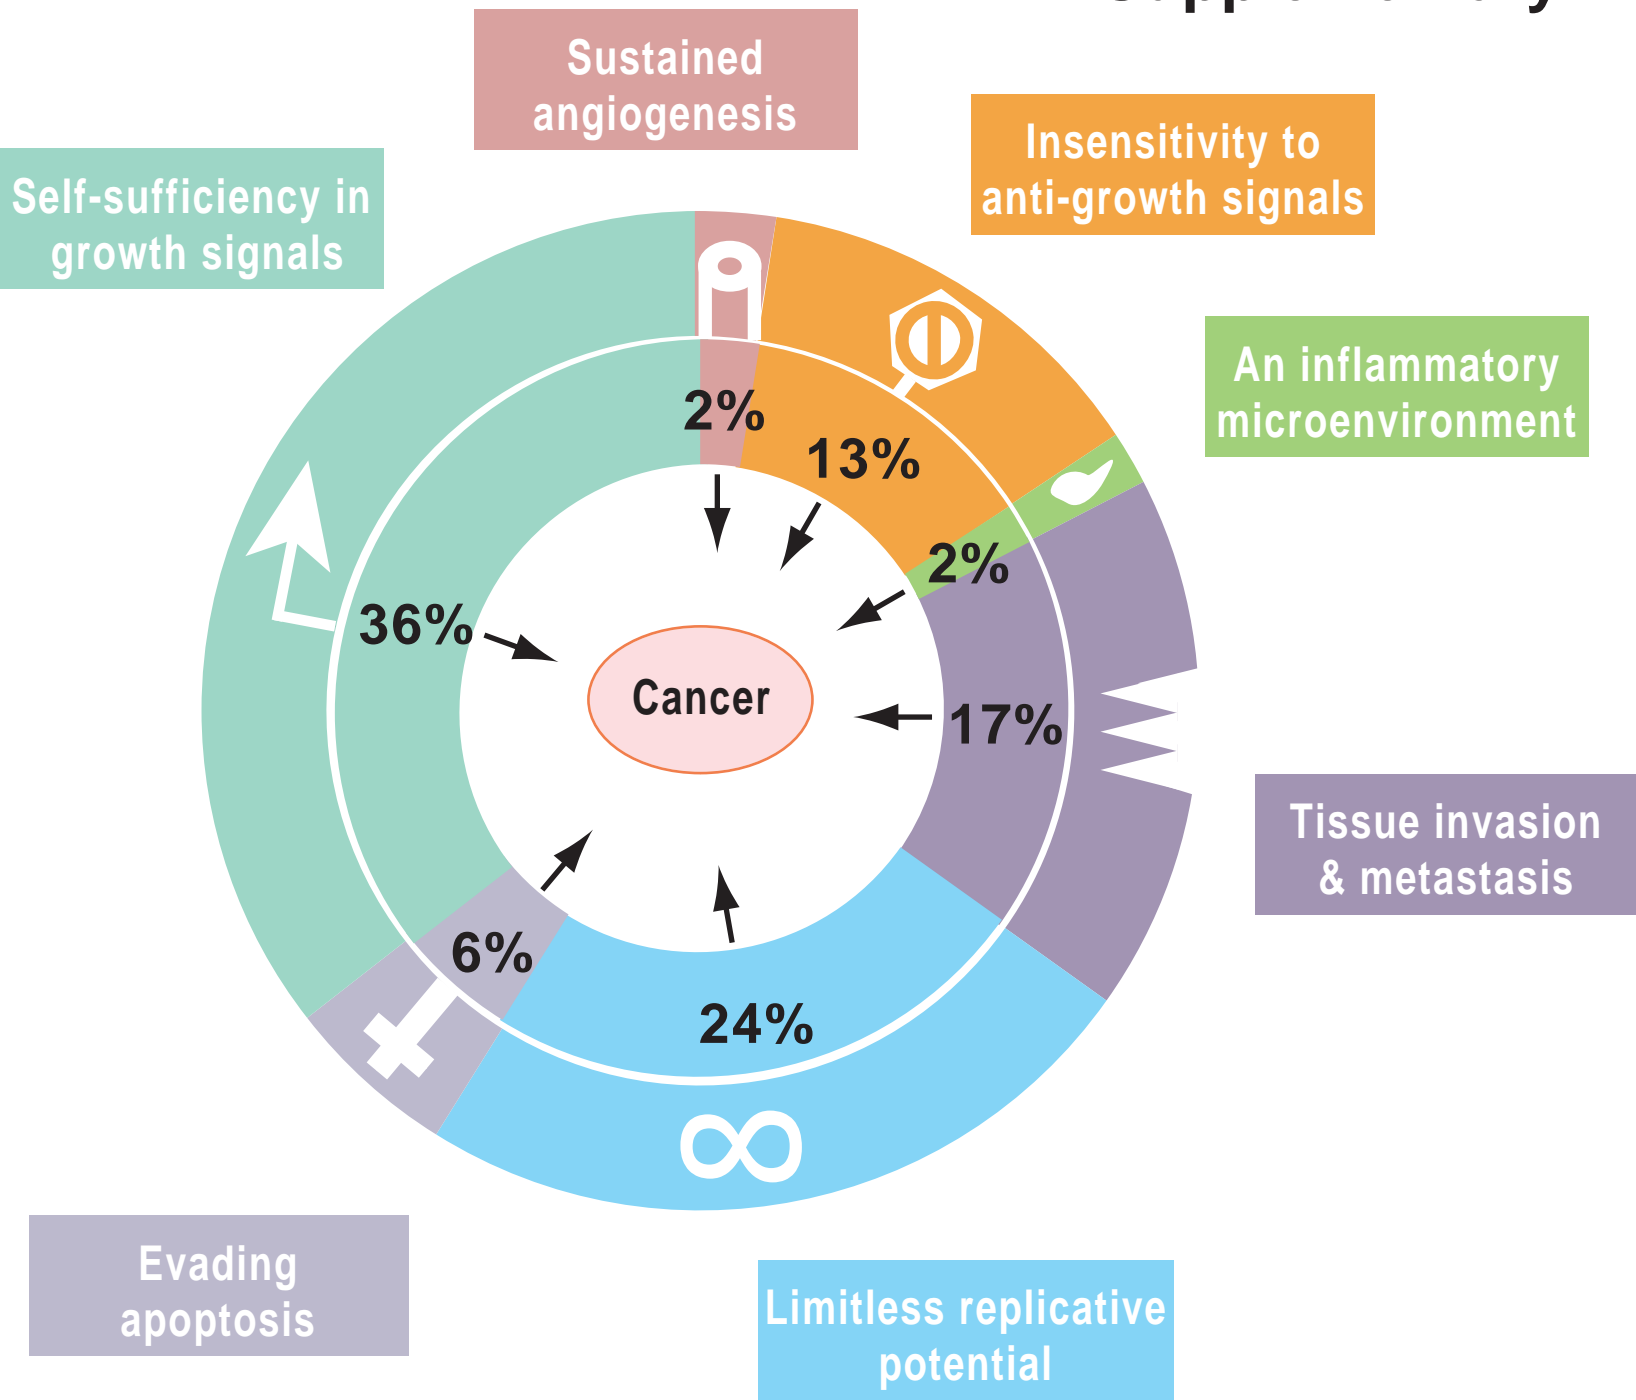

Supplement: supp_M900152-MCP200_Supp_Figure3.pdf [file supp_M900152-MCP200_Supp_Figure3.pdf]
